# Supplementary material for: Highly efficient Zn1−xCdxS catalysts with sphalerite structures synthesized via a novel green method for hydrogen production by water splitting
Source: PubMed Central journal article supplement — RSC Adv. 2024 Nov 26;14(51):37763–73. doi: 10.1039/d4ra05402d (PMC11589805; doi:10.1039/d4ra05402d), 2024-11-26
Supplement: RA-014-D4RA05402D-s001.pdf [file RA-014-D4RA05402D-s001.pdf]

## Highly efficient $\text{Zn}_{1-x}\text{Cd}_x\text{S}$ catalysts with sphalerite structure for hydrogen production by water splitting synthesized by a novel green method

M. González-Rodríguez<sup>a,b</sup>, S. Díaz-Coello<sup>a,b</sup>, S. Díaz-González<sup>a</sup>, V.D. Rodríguez<sup>c</sup>, M. Žitňan<sup>d</sup>, G. Galleani<sup>d</sup>, J.J. Velázquez<sup>d</sup>, E. Pastor<sup>a,b</sup>, P. Núñez<sup>a,b,\*</sup>

<sup>a</sup>Departamento de Química, U.D. Química Inorgánica, Universidad de La Laguna, Apto. 456, 38200 La Laguna, Tenerife (Spain)

<sup>b</sup>Instituto de Materiales y Nanotecnología, Universidad de La Laguna, Apto. 456, 38200 La Laguna, Tenerife (Spain)

<sup>c</sup>Departamento de Física, Universidad de La Laguna, Apto. 456, 38200 La Laguna, Tenerife (Spain)

<sup>d</sup>FunGlass, Alexander Dubcek University of Tencin, Studentska 2, 91150 Trencin, Slovakia

\* Email: [pnunez@ull.es](mailto:pnunez@ull.es) (Pedro Núñez)

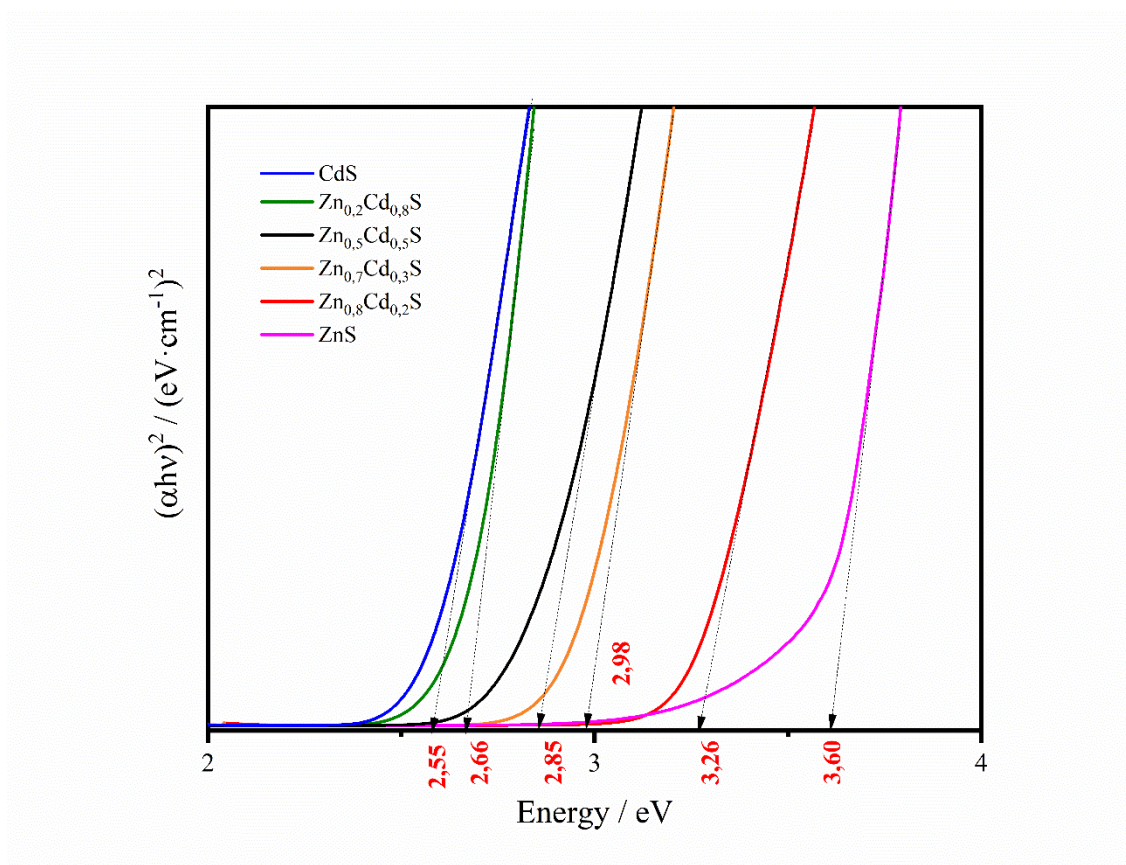

**Fig. S1.** Tauc Plot of all materials studied in this work, indicating the bandgap values for each material.

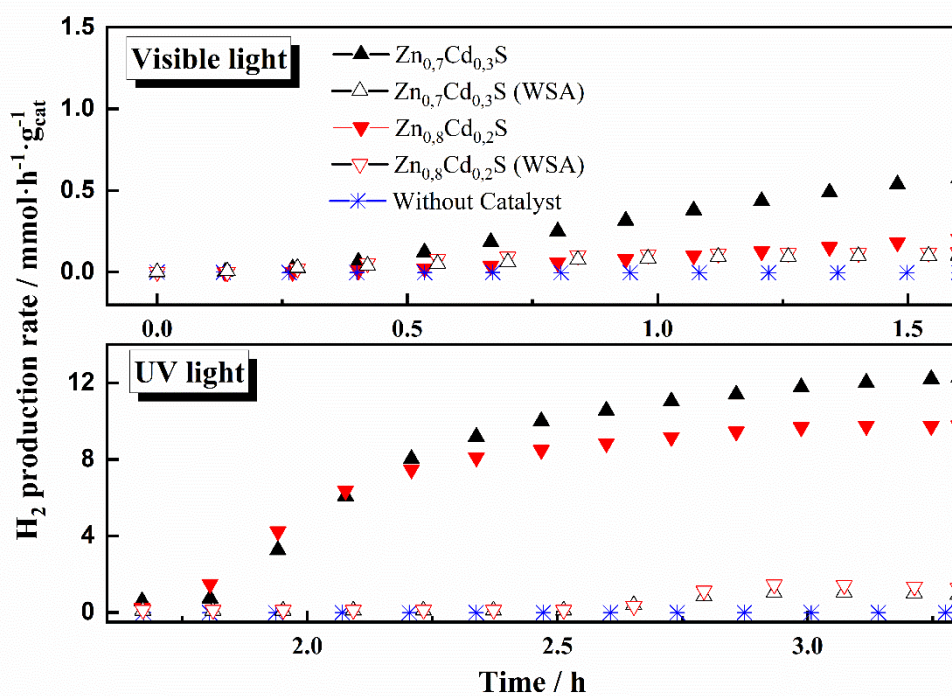

**Fig. S2** Plots of hydrogen production vs. time for Zn<sub>0.7</sub>Cd<sub>0.3</sub>S and Zn<sub>0.8</sub>Cd<sub>0.2</sub>S with (full triangle) and without (WSA, empty triangle) sacrificial agent under visible and UV light; and for the pure sacrificial agent (asterisk). It proved that the H<sub>2</sub> production for the Zn<sub>0.8</sub>Cd<sub>0.2</sub>S catalyst is lower than that for the Zn<sub>0.7</sub>Cd<sub>0.3</sub>S.
